# Supplementary material
Source: PubMed Central journal article supplement (PMC4135446)
Supplement: NIHMS582896-supplement-1.pdf [file NIHMS582896-supplement-1.pdf]

### Primary Validation

# of target genes: 28  
# of cell lines: 4  
# of siRNA: 3 individual  
plus a pool in triplets  
# of time points: 3  
(1.5, 3, and 4.5 days)  
CellTiterGlo (CTG) Assay  
ApoTox (Caspase) Assay

### Secondary Validation

# of target genes: 20  
# of cell lines: 5  
# of siRNA: pooled siRNA  
in triplets  
# of time points: 3  
(1.5, 3, and 4.5 days)  
Apotox (Viability, Caspase) Assay

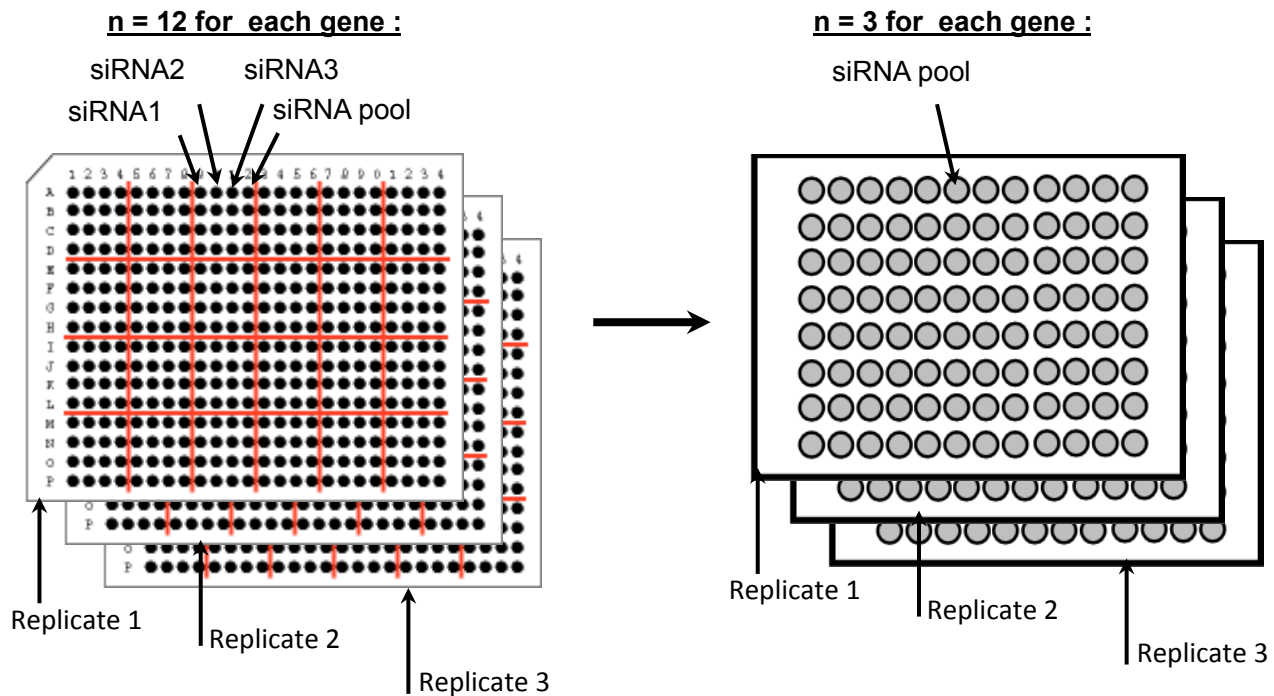

**Figure S1. Plate layouts for RNA interference mediated knockdown in HT RNAi primary validation screen and secondary RNAi validation assay.** Drawings of 384-well format for primary validation screen and 96-well format for secondary assay. Individual siRNAs and siRNA pooled approach depicted along with replicate plates; CellTiter-Glo assay (Promega) and Apotox-Glo assay (Promega).
