# Supplementary material
Source: PubMed Central journal article supplement (PMC4135446)
Supplement: NIHMS582896-supplement-2.pdf [file NIHMS582896-supplement-2.pdf]

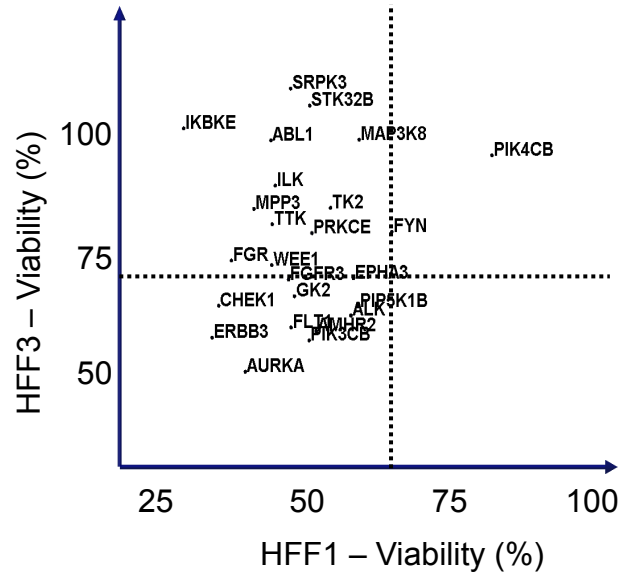

**Figure S2. Human foreskin fibroblast (HFF) kinase exclusion plot.** The top 38 kinase targets were evaluated to determine whether RNAi mediated inhibition caused toxicity to normal cells utilizing kinome screening data on two HFFs primary cultures. The common lethal space is depicted in the left lower hand corner of the plot to indicate the kinases whose inhibition caused >30% loss in cell viability in both HFFs screens.
