# Supplementary material
Source: PubMed Central journal article supplement (PMC4135446)
Supplement: NIHMS582896-supplement-3.pdf [file NIHMS582896-supplement-3.pdf]

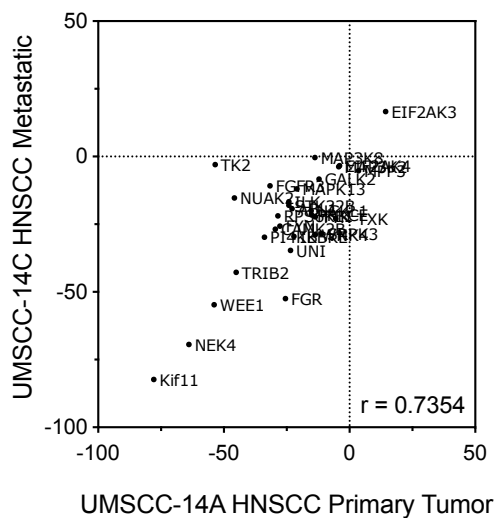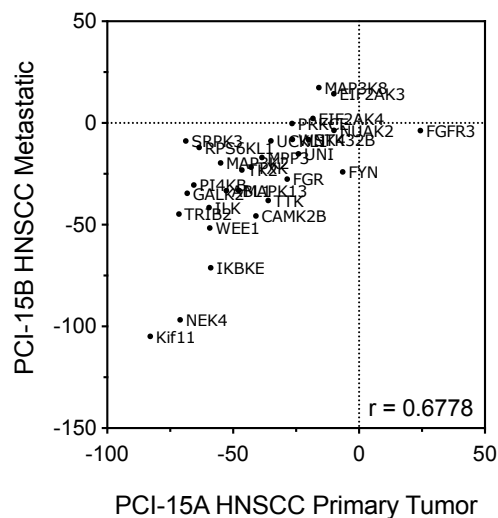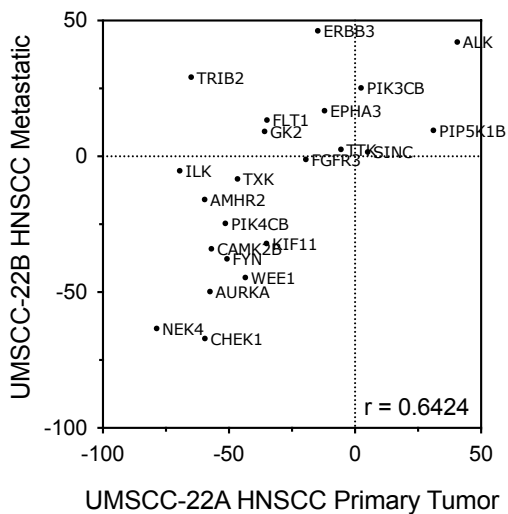

**Figure S3. Correlation plots of autologous HNSCC cell line pairs from primary tumor and recurrent/metastatic site from patients [14, 15, 22].** Correlation plots were generated from differential viability profiles of RNAi mediated knockdown of kinase targets. UM-SCC14A, UM-SCC14C [ $r = 0.7354$ ,  $P < 0.0001$ ]; UM-SCC15A, UM-SCC15B [ $r = 0.6778$ ,  $P < 0.0001$ ]; UM-SCC22A, UM-SCC22B [ $r = 0.6424$ ,  $P < 0.0013$ ]. Pearson correlation coefficients generated utilizing 30 data points on UM-SCC14, UM-SCC15, and 22 data points on UM-SCC22.
