# Supplementary material
Source: PubMed Central journal article supplement (PMC4135446)
Supplement: NIHMS582896-supplement-4.pdf [file NIHMS582896-supplement-4.pdf]

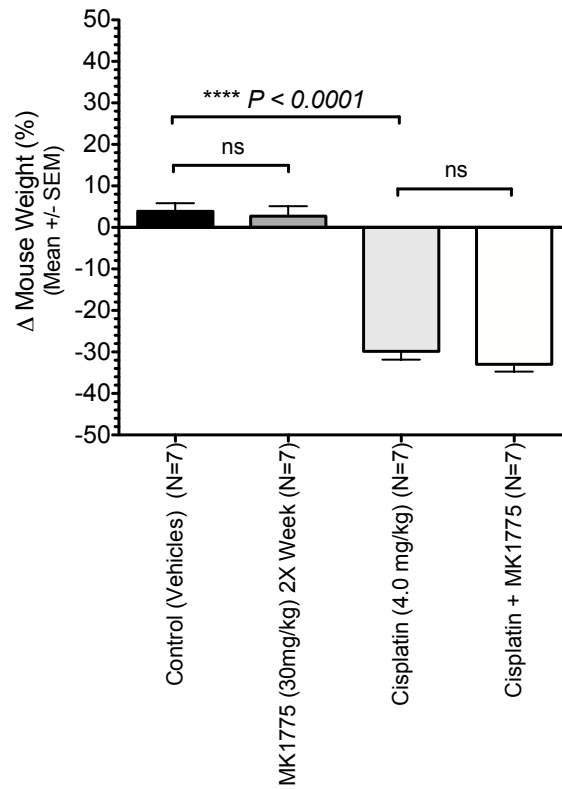

**Figure S4. Body weight of MK-1775 treated mice.** Bar graph of percentage change (Mean +/- SEM) in body weight for all treatment groups; unpaired t-tests: control vs. MK-1775, non-significant (ns); cisplatin vs. cisplatin plus MK-1775, ns; control vs. cisplatin, \*\*\*\*  $P < 0.0001$ .
