# Supplementary material
Source: PubMed Central journal article supplement (PMC4135446)
Supplement: NIHMS582896-supplement-5.pdf [file NIHMS582896-supplement-5.pdf]

## Supplementary Table Legends

**Table S1. Characteristics of the HNSCC cell lines.** HNSCC cell line information on the site origin (primary tumor, metastatic site, or recurrence post-chemo/radiation therapy), the metastatic status of the patient, TP53 mutational status of each cell line, and phenotypic validation of cell line in an orthotopic *in vivo* model of HNSCC.

**Table S2. Characteristics of the MSCC cell lines with germline mutations in p53 pathway genes.** MSCC cell line information on germline mutation (genotype), Trp53 mutational status, Hras status, and murine inbred strain of derivation. A reference list to published studies is also provided in which murine germline mutations in p53 pathway genes and the resulting phenotypes were characterized in a chemical carcinogenesis model (DMBA/TPA) of squamous cell carcinoma.

**Table S3. Human kinome (713 kinases).** Sigma kinome library available through the Quellos High Throughput Facility at the University of Washington Institute for Stem Cell and Regenerative Medicine (<http://depts.washington.edu/uwhs/>).

**Table S4. Murine kinome (572 kinases).** Ambion kinome library available through the Quellos High Throughput Facility at the University of Washington Institute for Stem Cell and Regenerative Medicine (<http://depts.washington.edu/uwhs/>).

**Table S5. Interspecies kinome (508 kinases).** Comparative analysis of human kinome (Table S3) and murine kinome (Table S4) cross-referenced utilizing Mouse Genomics Informatics (MGI) (<http://www.informatics.jax.org/>) and National Center for Biotechnology Information (NCBI) (<http://www.ncbi.nlm.nih.gov/>) database nomenclature to generate a common list of 508 kinases referred to as the interspecies kinome

**Table S6. Primary validation siRNAs.** List of 84 unique siRNAs with 3 siRNAs per gene to 28 kinase targets used in the primary validation screen (Qiagen, FR).

**Table S7. Secondary validation siRNAs.** List of 57 siRNAs to 2-3 siRNAs per gene target, to 20 kinase targets used in the secondary validation assay (Qiagen, FR).

**Table S8. Interspecies kinase targets selected for validation.** Kinase targets (38 kinases) selected from interspecies kinome comparisons for validation. Interspecies comparisons included cell line stratification by genotype (p53mutant/ p53 deficiency) and metastatic *in vivo* phenotype. All cell lines comparison included: [HNSCC: UMSCC-14A, UMSCC-14C, UMSCC-15A, UMSCC-15B, UMSCC-O19 & MSCC: MSCC-CK101, MSCC-CK102, MSCC-CK103, MSCC-CK104], p53 mutant comparison [HNSCC: UMSCC-14A, UMSCC-14C, JHU-O19 & MSCC: MSCC-CK102 (*Hras*<sup>Q61L</sup> *Trp53*<sup>+/-</sup>)], metastatic comparison included

[HNSCC: UMSCC-14C, UMSCC-15B & MSCC: MSCC-CK102 (*Hras*<sup>Q61L</sup> *Trp53*<sup>+/-</sup>), MSCC-CK103 (*Hras*<sup>wt</sup> *p19Arf*<sup>-/-</sup>)]. Global Z-score calculations utilized to select 38 kinases from these three comparisons [Z-score<sub>Mean All</sub> < -1.0, Z-score<sub>p53 mutant</sub> < -2.0, Z-score<sub>Mean Met</sub> < -1.5]; denoted in column format.

**Table S9. HT RNAi primary validation screen with siRNA pool deconvolution.** Primary validation screen normalized cell viability data (CellTiterGlo assay) and caspase 3/7 dependent apoptosis data (Apotox, caspase reagent) from 384-well high throughput screening.

**Table S10. Differential analysis of primary validation screen (CTG) N=12.** Differential viability calculated using mean of cell viability measures at day 4.5 and day 1.5 (d4.5-d1.5) for all 28 kinase targets utilizing all 12 data points from three separate siRNAs per gene plus a pool of all three siRNAs each in triplicate.

**Table S11. Differential analysis of primary validation screen (CTG) N=3 pooled.** Differential viability calculated using mean of cell viability measures at day 4.5 and day 1.5 (d4.5-d1.5) for all 28 kinase targets utilizing pool of all three siRNAs each in triplicate.

**Table S12. Statistical analysis summary of differential viability (CTG).** Statistically significant differences in differential viabilities resulting from RNAi mediated knockdown of 28 kinase targets using N=12 and N=3 pooled siRNA data evaluated versus the universal negative control siRNA using one-way ANOVA with Dunnetts post-test for multiple comparisons, P<0.05 as significant.

**Table S13. Statistical analysis (absolute viability) of primary validation screen (CTG).** Results (i.e. scored 'hits') from negative control-independent and negative control-dependent statistical analysis of absolute viability at day 4.5 post-transfection on independent siRNA triplicates and pooled siRNAs in triplicate; positive controls Kif11 (N=24), and universal negative control UNI (N=24) indicated.

**Table S14. HT RNAi primary validation screen summary of 'hits' (CTG).** Summary of all scored 'hits' from negative control-independent and negative control-dependent statistical analysis on absolute viability at day 4.5 post-transfection.

**Table S15. HT caspase 3/7-dependent apoptosis AUC analysis (Apotox) N=12.** AUC estimates of caspase-dependent apoptosis were calculated utilizing all three data points (1.5 day, 3 day, 4.5 day) for all kinase targets and all 12 data points from three separate siRNAs per gene plus a pool of all three siRNAs each in triplicate.

**Table S16. HT caspase 3/7-dependent apoptosis AUC analysis (Apotox) N=3 pooled.** AUC estimates of caspase-dependent apoptosis were calculated utilizing all three data points (1.5 day, 3 day, 4.5 day) for all kinase targets utilizing pool of all three siRNAs each in triplicate.

**Table S17. Statistical analysis summary for caspase 3/7 dependent apoptosis (Apotox).** Statistically significant differences in AUC estimates of caspase-dependent apoptosis resulting from RNAi mediated knockdown of kinase targets using N=12 and N=3 pooled siRNA data evaluated versus the universal negative control siRNA using one-way ANOVA with Dunnetts post-test for multiple comparisons,  $P < 0.05$  as significant.

**Table S18. Secondary validation assay statistical analysis (absolute viability).** Statistically significant differences in absolute viability (day 4.5) resulting from RNAi mediated knockdown of kinase targets of pooled siRNAs in triplicate evaluated versus the siRNA negative control (SINC) using one-way ANOVA with Dunnetts post-test for multiple comparisons,  $P < 0.05$  as significant.

**Table S19. Differential viability and caspase 3/7 dependent apoptosis AUC analysis of secondary validation assay.** Differential viability calculated using mean of cell viability measures at day 4.5 and day 1.5 (d4.5-d1.5) for all 20 kinase targets utilizing pool of all three siRNAs each in triplicate. AUC estimates of caspase-dependent apoptosis calculated utilizing all three data points (1.5 day, 3 day, 4.5 day) for all kinase targets utilizing pool of all three siRNAs each in triplicate.

**Table S20. Statistical analysis summary of differential viability and caspase 3/7 dependent apoptosis.** Statistically significant differences in differential viability and caspase-dependent apoptosis ( $AUC_{estimate}$ ) resulting from RNAi mediated knockdown of 20 kinase targets on pooled siRNAs in triplicate evaluated versus the siRNA negative control (SINC) using one-way ANOVA with Dunnetts post-test for multiple comparisons,  $P < 0.05$  as significant.

**Table S21. Drug sensitivity and TP53 mutational status data on squamous cell carcinoma cell lines from COSMIC on Wee1/Chk1 Inhibitor (681460).** Table outlining TP53 gene mutational status (TP53 specific mutation, disruptive status, squamous cell origin) from the Sanger Cancer Cell Line Project on 820 cell lines and cross-referenced with the Catalogue of Somatic Mutations in Cancer (COSMIC) drug sensitivity data (Release 2 July 2012) on 541 cancer cell lines treated with a WEE1/CHK1 inhibitor, 681460.  $IC_{50}$  values presented as natural log ( $\mu M$ ).
